# Supplementary material for: Excess serum Na level in rats administered with high doses of (−)-epigallocatechin gallate-casein nanoparticles prepared with sodium caseinate
Source: Royal Society of Chemistry journal article supplement (doi:10.1039/d1fo02890a), 2022-01-01
Supplement: d1fo02890a1.pdf [file d1fo02890a1.pdf]

## Supporting information

Excess serum Na level in the rats administrated high doses of (–)-  
epigallocatechin gallate-casein nanoparticles prepared with sodium  
caseinate

Yahui Zhang<sup>a,†</sup>, Shuya Han<sup>a,†</sup>, Yin Wang<sup>b</sup>, Haihua Zhang<sup>a</sup>, Chenhuan Yu<sup>c</sup>, Dingkui  
Qin<sup>a</sup>, Qizhen Du<sup>a,\*</sup>, Peng Jin<sup>a,\*</sup>

<sup>a</sup>College of Food and Health Sciences, Zhejiang A & F University, Hangzhou 311300, China

<sup>b</sup>Institute of Hygienics, Zhejiang Academy of Medical Sciences, Hangzhou 310013, China

<sup>c</sup>Experimental Animal Center, Zhejiang Academy of Medical Sciences, Hangzhou 310013,  
China

<sup>†</sup>Both authors contributed equally to this work

\*Correspondence: qizhendu@163.com (Q.D.); jinpeng@zafu.edu.cn (P.J.)

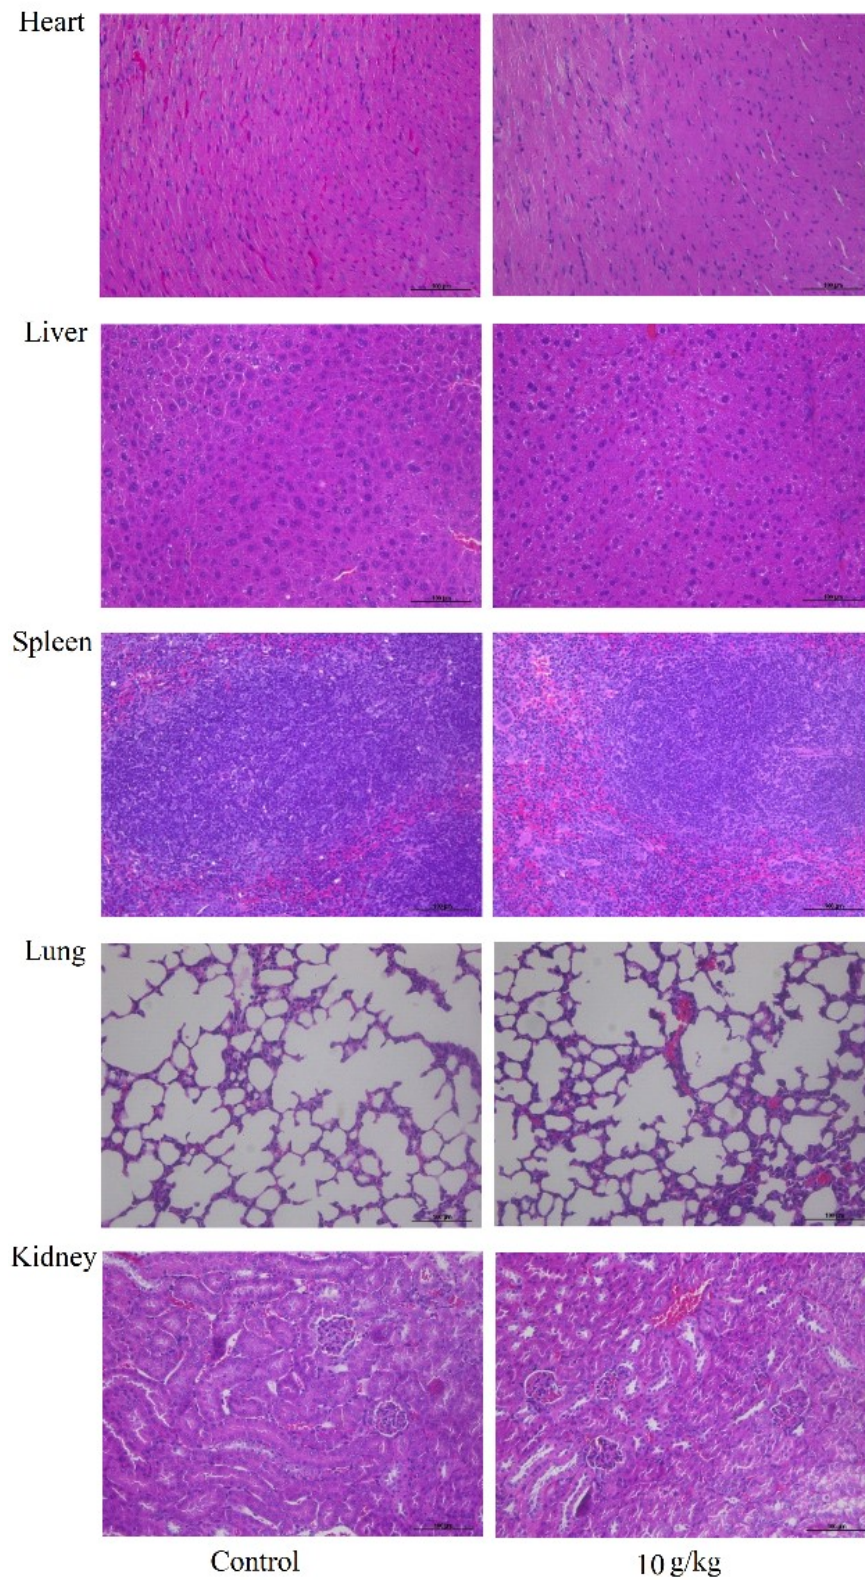

Fig. S1 Effects of the maximum dose of FD-EGCG-NPs on the organic tissues of the rats. Left column, control; right column, treated with 10 g/kg BW FD-EGCG-NPs. Photomicrographs (200× original magnification) of H&E stained sections of the organs.

Table S1 The results of urine test in female rats (Number, n=10)

| Indicators | Degree | Negative control | FD-NPs      |              | FD-EGCG-NPs |              |
|------------|--------|------------------|-------------|--------------|-------------|--------------|
|            |        |                  | 5.0 g/kg BW | 10.0 g/kg BW | 5.0 g/kg BW | 10.0 g/kg BW |
| Glu        | -      | 10               | 10          | 10           | 10          | 10           |
|            | + -    | 0                | 0           | 0            | 0           | 0            |
|            | 1+     | 0                | 0           | 0            | 0           | 0            |
| PRO        | -      | 0                | 0           | 0            | 0           | 0            |
|            | + -    | 3                | 2           | 3            | 4           | 4            |
|            | 1+     | 7                | 8           | 6            | 6           | 5            |
|            | 2+     | 0                | 0           | 1            | 0           | 1            |
|            | 3+     | 0                | 0           | 0            | 0           | 0            |
| BLD        | -      | 10               | 10          | 10           | 10          | 10           |
|            | + -    | 0                | 0           | 0            | 0           | 0            |
|            | 1+     | 0                | 0           | 0            | 0           | 0            |
| SG         | 1.005  | 1                | 2           | 2            | 1           | 2            |
|            | 1.010  | 6                | 4           | 7            | 9           | 6            |
|            | 1.015  | 2                | 4           | 1            | 0           | 2            |
|            | 1.020  | 1                | 0           | 0            | 0           | 0            |
|            | 1.025  | 0                | 0           | 0            | 0           | 0            |
| pH         | 5.5    | 0                | 0           | 1            | 0           | 2            |
|            | 6.0    | 5                | 7           | 7            | 8           | 7            |
|            | 6.5    | 0                | 0           | 0            | 0           | 0            |
|            | 7.0    | 3                | 1           | 1            | 2           | 1            |
|            | 7.5    | 2                | 2           | 1            | 0           | 0            |

Table S2 The results of urine test in male rats (Number, n=10)

| Indicators | Degr<br>ee | Negative<br>control | FD-NPs      |              | FD-EGCG-NPs |              |
|------------|------------|---------------------|-------------|--------------|-------------|--------------|
|            |            |                     | 5.0 g/kg BW | 10.0 g/kg BW | 5.0 g/kg BW | 10.0 g/kg BW |
| Glu        | -          | 10                  | 10          | 10           | 10          | 10           |
|            | +-         | 0                   | 0           | 0            | 0           | 0            |
|            | 1+         | 0                   | 0           | 0            | 0           | 0            |
| PRO        | -          | 0                   | 0           | 0            | 0           | 0            |
|            | +-         | 0                   | 0           | 0            | 0           | 0            |
|            | 1+         | 9                   | 10          | 9            | 9           | 9            |
|            | 2+         | 1                   | 0           | 1            | 1           | 1            |
|            | 3+         | 0                   | 0           | 0            | 0           | 0            |
| BLD        | -          | 10                  | 10          | 10           | 10          | 10           |
|            | +-         | 0                   | 0           | 0            | 0           | 0            |
|            | 1+         | 0                   | 0           | 0            | 0           | 0            |
| SG         | 1.005      | 0                   | 0           | 0            | 0           | 0            |
|            | 1.010      | 3                   | 0           | 2            | 1           | 2            |
|            | 1.015      | 3                   | 5           | 5            | 4           | 6            |
|            | 1.020      | 3                   | 5           | 2            | 5           | 1            |
|            | 1.025      | 1                   | 0           | 1            | 0           | 1            |
| pH         | 5.5        | 1                   | 0           | 0            | 0           | 0            |
|            | 6.0        | 2                   | 3           | 5            | 5           | 6            |
|            | 6.5        | 0                   | 0           | 0            | 1           | 0            |
|            | 7.0        | 3                   | 4           | 1            | 3           | 0            |
|            | 7.5        | 4                   | 3           | 3            | 1           | 3            |
|            | 8.0        | 0                   | 0           | 1            | 0           | 1            |
